# Supplementary material for: Exploiting Gangliosides for the Therapy of Ewing’s Sarcoma and H3K27M-Mutant Diffuse Midline Glioma
Source: MDPI journal article supplement (doi:10.3390/cancers13030520), 2021-01-29
Supplement: s1 [file s1]

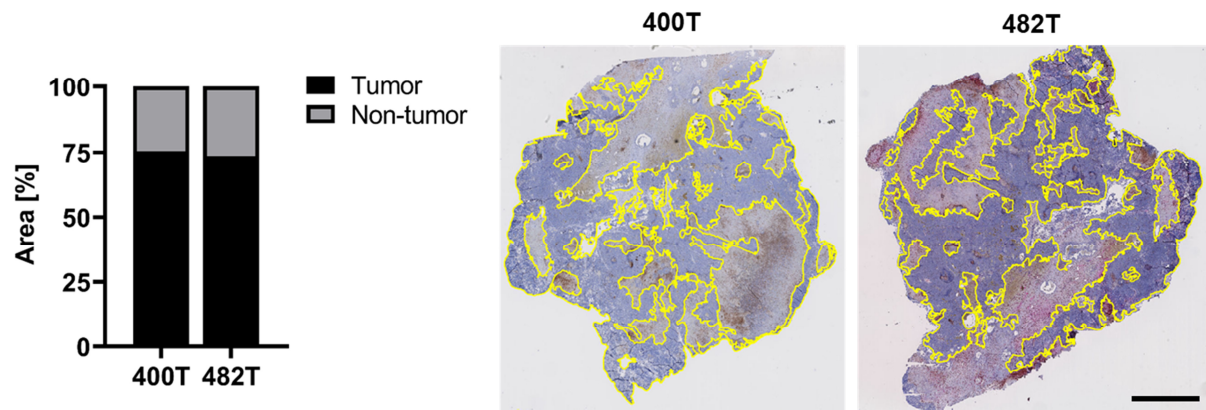

**Supplemental Figure 7. Supervised machine-learning-based classification of tumor and non tumor tissue.** Irrelevant structures including background, holes and artefacts were also classified, but excluded from further analyses. Bar: 2 mm.
