# Supplementary material for: Exploiting Gangliosides for the Therapy of Ewing’s Sarcoma and H3K27M-Mutant Diffuse Midline Glioma
Source: MDPI journal article supplement (doi:10.3390/cancers13030520), 2021-01-29
Supplement: s1 [file s1]

482

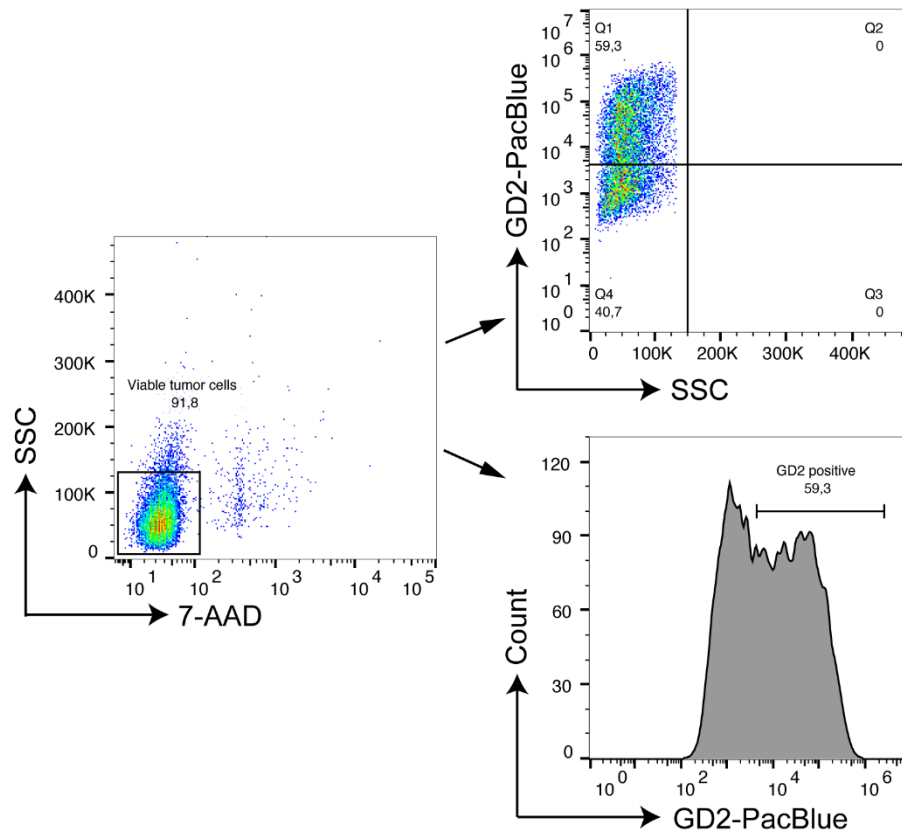

### Supplemental Figure 2. Gating strategy

The 7-AAD against sideward scatter (SSC) plot was used to gate viable tumor cells. Dotplot with SSC against GD2 and GD2 histogram display the GD2 expression of viable tumor cells.
