# Supplementary material for: Exploiting Gangliosides for the Therapy of Ewing’s Sarcoma and H3K27M-Mutant Diffuse Midline Glioma
Source: MDPI journal article supplement (doi:10.3390/cancers13030520), 2021-01-29
Supplement: s1 [file s1]

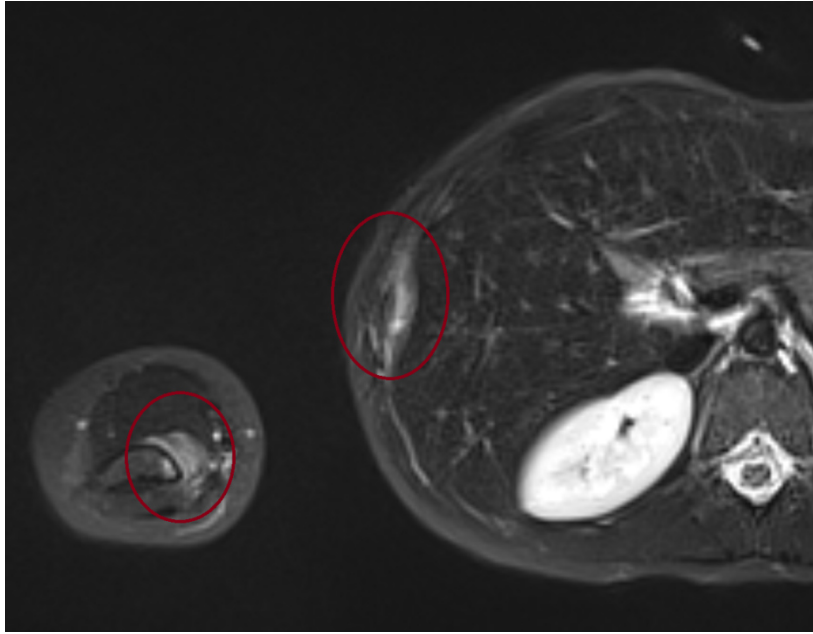

**Supplemental Figure 6.**

Transversal T2-weighted short-tau inversion recovery MRI sequence showing bone metastases of the right distal humerus and 9th rib at week 60.
