# Supplementary material for: Exploiting Gangliosides for the Therapy of Ewing’s Sarcoma and H3K27M-Mutant Diffuse Midline Glioma
Source: MDPI journal article supplement (doi:10.3390/cancers13030520), 2021-01-29
Supplement: s1 [file s1]

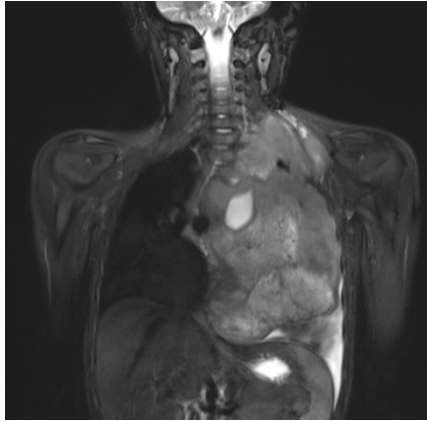

**Supplemental Figure 4. ES at diagnosis**

Coronal T2-weighted short-tau inversion recovery MRI sequence demonstrating a large mass in the left hemithorax arising from the 1<sup>st</sup> rib, which extended cranially into the supraclavicular region.
