# Supplementary material for: Exploiting Gangliosides for the Therapy of Ewing’s Sarcoma and H3K27M-Mutant Diffuse Midline Glioma
Source: MDPI journal article supplement (doi:10.3390/cancers13030520), 2021-01-29
Supplement: s1 [file s1]

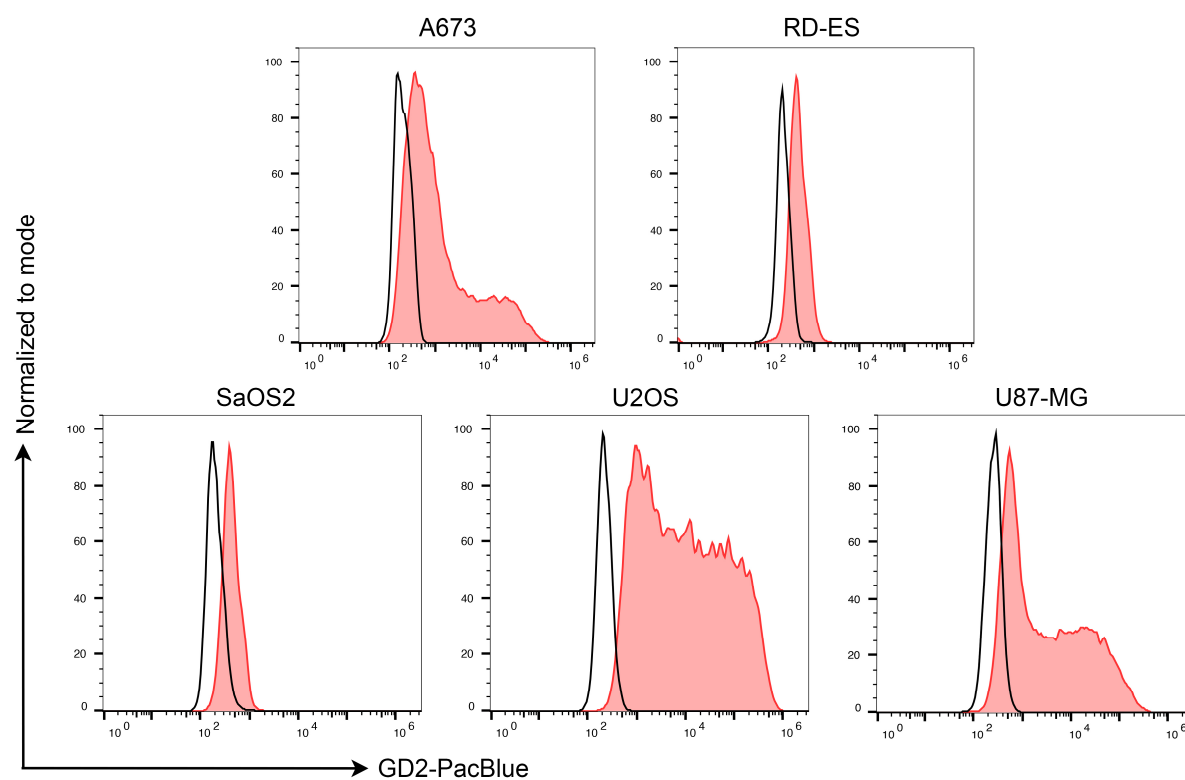

### Supplemental Figure 3. Expression of GD2 in commercially available cell lines

GD2 expression was analyzed by flow cytometry. A673, RD-ES are Ewing's Sarcoma cell lines. SaOS2, U2OS are osteosarcoma cell lines. U87-MG is a glioblastoma cell line
