# Supplementary material for: Exploiting Gangliosides for the Therapy of Ewing’s Sarcoma and H3K27M-Mutant Diffuse Midline Glioma
Source: MDPI journal article supplement (doi:10.3390/cancers13030520), 2021-01-29
Supplement: s1 [file s1]

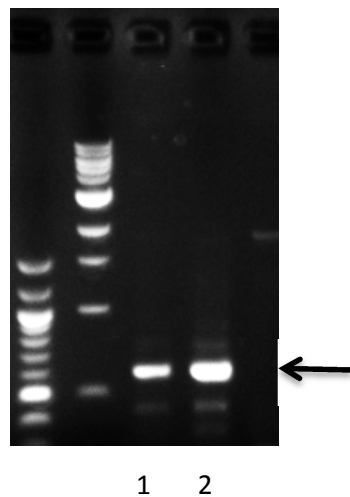

**Supplemental Figure 5. Detection of the EWSR1-FL1 fusion**

RNA was extracted from primary tumor cells isolated from the tumor before (1) or after (2) the dinutuximab therapy. The EWSR1-FL1 fusion was amplified with specific primers (arrow) and validated by Sanger Sequencing
