# Supplementary material for: Exploiting Gangliosides for the Therapy of Ewing’s Sarcoma and H3K27M-Mutant Diffuse Midline Glioma
Source: MDPI journal article supplement (doi:10.3390/cancers13030520), 2021-01-29
Supplement: s1 [file s1]

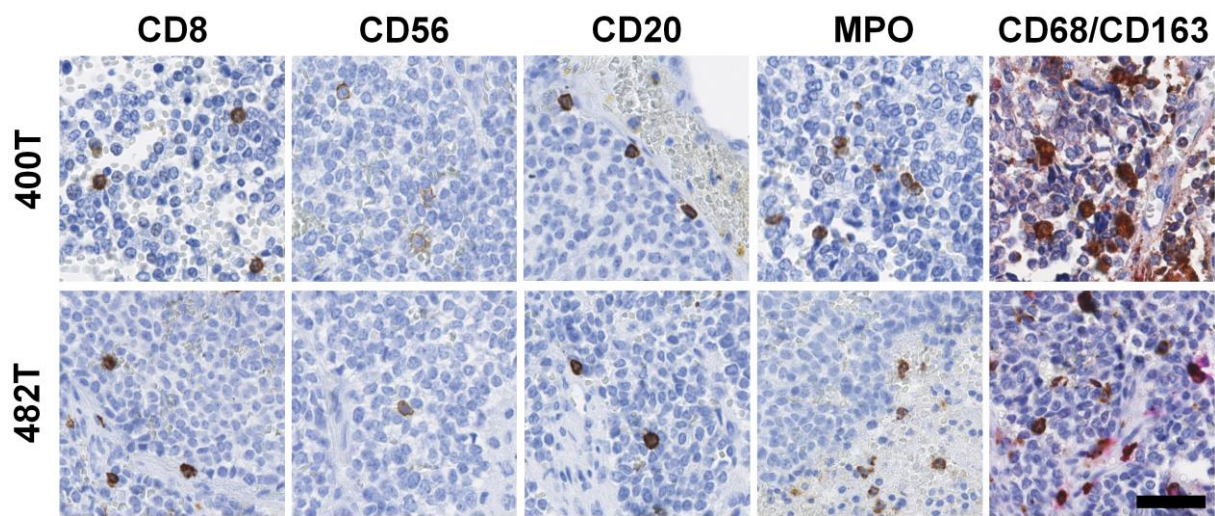

Supplemental Figure 9. Representative immunohistochemistry images of CD8, CD56, CD20, MPO, CD68 and CD163 before (400T) and after (482T) dinutuximab treatment. The macrophage markers CD68 and CD163 were co-stained (brown/magenta). Scale bar: 50  $\mu$ m.
