# Supplementary material for: Exploiting Gangliosides for the Therapy of Ewing’s Sarcoma and H3K27M-Mutant Diffuse Midline Glioma
Source: MDPI journal article supplement (doi:10.3390/cancers13030520), 2021-01-29
Supplement: s1 [file s1]

Archive with 9 entries (9 files):
- Supplemental Figure 1.pdf
- Supplemental Figure 2.pdf
- Supplemental Figure 3.pdf
- Supplemental Figure 4.pdf
- Supplemental Figure 5.pdf
- Supplemental Figure 6.pdf
- Supplemental Figure 7.pdf
- Supplemental Figure 8.pdf
- Supplemental Figure 9.pdf
